# Supplementary material for: Bacterial chemotaxis towards polysaccharide pectin by pectin-binding protein
Source: PubMed Central journal article supplement (PMC7055323; doi:10.1038/s41598-020-60274-1), 2020-03-04
Supplement: 41598_2020_60274_MOESM1_ESM.pdf [file 41598_2020_60274_MOESM1_ESM.pdf]

## Supplementary Information

### **Bacterial chemotaxis towards polysaccharide pectin by pectin-binding protein**

Hidenori Konishi<sup>1</sup>, Mamoru Hio<sup>2</sup>, Masahiro Kobayashi<sup>1</sup>, Ryuichi Takase<sup>1,2</sup>, & Wataru Hashimoto<sup>1,2</sup>

<sup>1</sup>Laboratory of Basic and Applied Molecular Biotechnology, Division of Food Science and Biotechnology, Graduate School of Agriculture, Kyoto University, Uji, Kyoto 611-0011, Japan;

<sup>2</sup>Laboratory of Basic and Applied Molecular Biotechnology, Department of Food Science and Biotechnology, Faculty of Agriculture, Kyoto University, Uji, Kyoto 611-0011, Japan;

Correspondence and requests for materials should be addressed to W. H. (email: [whasimot@kais.kyoto-u.ac.jp](mailto:whasimot@kais.kyoto-u.ac.jp))

**Table S1.** Mutations in the genome of strain A1-M5.

An excel file for Table S1 was separately uploaded.

**Table S2.** Primers used in this study.

| <b>Primer</b>                | <b>Sequence (5'-3')</b>                 |
|------------------------------|-----------------------------------------|
| pKS_F1                       | AAAAATGGCAGCGCTGGCAGTCCTT               |
| pKS_R2                       | GGCGGTGCTACAGAGTTCTTGAAGT               |
| r-3kbp→6kbp f                | TGATCGACCTGCAAGAGCGCATCCA               |
| r-3kbp→6kbp r                | TGTTCAAGCGCTCGACGCGAGTGCT               |
| f→3.2kbp                     | GGGTTCGTCGTCAAAGCGTCCTGTCA              |
| r-6kbp→9kbp f                | ACACACCCAAAGCGCCGCTTGACTG               |
| r-6kbp→9kbp r                | GCTCAGGTCAACATGAGCAACCTGC               |
| f-3.2kbp→6.2kbp f            | TGCTCAAGCCACGTTTGGCCGCGTT               |
| f-3.2kbp→6.2kbp r            | CACGACGCGCCCAATGTTACCTCA                |
| r-9kbp→12kbp f               | GGTTCGTAGCTGTTCGTCAGTCATT               |
| r-9kbp→12kbp r               | TTTCACGCAAGCGCCGATGCTGGAA               |
| f-6.2kbp→9.2kbp f            | ATGAGGTGAACATTGGGCGCGTTCGT              |
| f-6.2kbp→9.2kbp r            | ATGGCGATGTCCAGCCCCACGGTAT               |
| r-12kbp→f                    | TTGCGTGAAAGCAGCAGCGATCGCC               |
| f-9.2kbp→12kbp f             | ATACCGTGGGGCTGGACATCGCCAT               |
| f-9.2kbp→12kbp r             | GACCAACCACGTGACGGTGGCGATA               |
| f-12kbp→f                    | TATCGCACCGTACGCTGGTTGGTC                |
| r-1289838~                   | TAGACCAGCGTCTGCAATTCCAGGC               |
| f-3135268~                   | TACGCTGTGGGAGACCGACGAGGTT               |
| sph2942 BamHI infusion f     | TCGCGCGACCGGATCAATGCAAGGCCGTTCAACGC     |
| sph2942 BamHI infusion r     | AACGTTGCCCCGGATCCGACAAGGGCAGATACACGT    |
| sph1119 BamHI infusion f     | TCGCGCGACCGGATCGCGGGAACATTTCTTGTTC      |
| sph1119 BamHI infusion r     | AACGTTGCCCCGGATCGTTCGATTACGCAACCAGCCG   |
| sph1117 BamHI infusion f     | TCGCGCGACCGGATCCCGTTCGTACCACCGTTAACC    |
| sph1117 BamHI infusion r     | AACGTTGCCCCGGATCGTATCGGAGAAGTTCGCCCCG   |
| sph1118 BamHI infusion f     | TCGCGCGACCGGATCACGAACTTGCCGATCGACCA     |
| sph1118 BamHI infusion r     | AACGTTGCCCCGGATCATTGGCGCCCATACCTCCAG    |
| sph2733 BamHI infusion f     | TCGCGCGACCGGATCTTCAAGCTGGGCTACCTCGC     |
| sph2733 BamHI infusion r     | AACGTTGCCCCGGATCGGACGTACGGATGATGTCGA    |
| sph1118 BamHI infusion f new | TCGCGCGACCGGATCTGATGATCACGGGGATCACC     |
| sph1118 BamHI infusion r new | AACGTTGCCCCGGATCTTAAAACGGCCGCGCAACCA    |
| sph1117 f                    | AAGCGATACCACATCAGCGTCCACT               |
| sph1117 r                    | AGAAGCGTATGGCGCTGTACGACCA               |
| sph1118 f                    | TACGTTCTTCATGCTTTTCGTTTCGG              |
| sph1118 r                    | TCGTAGTTCATCCCTAGGAGGACAA               |
| sph1119 f                    | ATGAGTCGACCCCTTCATTTTCTGC               |
| sph1119 r                    | TCAGGCGTTTGAACCTACCTGATGTC              |
| sph1117 f inverse            | AAGTCATCGGCACGGTTCGTCCGGC               |
| sph1117 r inverse            | TGAGTCTTGGCGGCGACGAACTGGT               |
| sph1118 f inverse            | GACGGTGTAAATCGTCAACCTTCGAA              |
| sph1118 r inverse            | TGGCTATGGACCGTGACGAGATCAA               |
| sph1119 f inverse            | GGGCGACCTCCAGTGCCTCGGTATT               |
| sph1119 r inverse            | AATGACCGCGCACGCCATGCACGGA               |
| SPH1118 NdeI(S)              | GGCATATGGCTGCTTTCACGCAAGCGCCGA          |
| SPH1118 NdeI(L)              | GGCATATGATGAGGTTTTACTCTCGCAAGTTTGGC     |
| Km-F                         | GGGGGCGCTGAGGTCTGCCTCGTGAAG             |
| Km-R                         | GGGGGAAAGCCACGTTGTGTCTCAAAA             |
| sph1118-NdeI in fusion       | AAGGAGATATACATATGGCTGCTTTCACGCAAGCGCCGA |
| sph1118-XhoI in fusion       | GGTGGTGGTGTCTCGAGCTTGGAGAAGTACCACTGCT   |

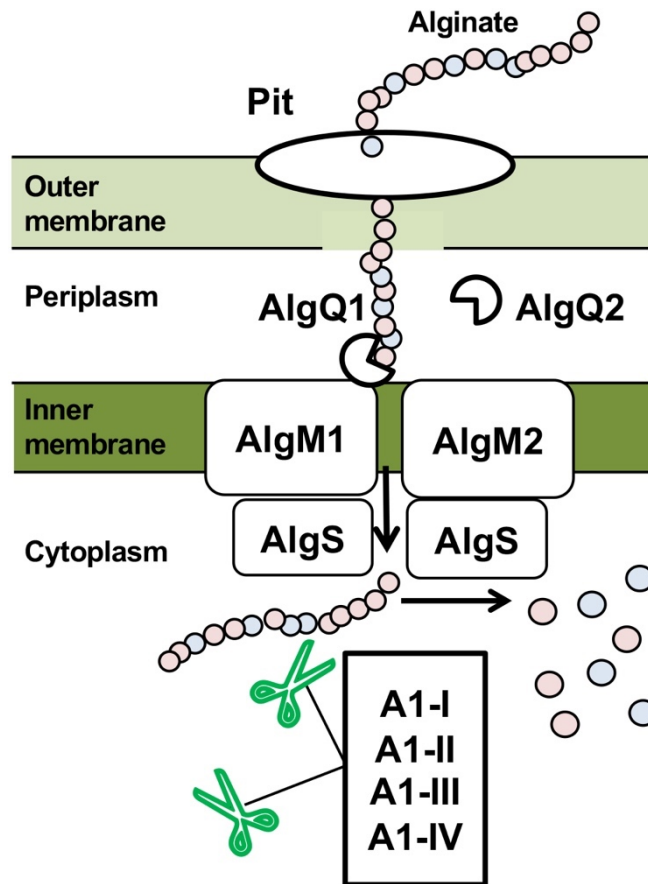

**Figure S1.** Import and degradation of alginate polysaccharide by strain A1 cells. Extracellular alginate is incorporated to the periplasm through the cell-surface pit and bound to the periplasmic binding protein (AlgQ1 or AlgQ2). The binding protein delivers the polysaccharide to the ABC transporter (AlgM1-AlgM2/AlgS-AlgS), which imports alginate to the cytoplasm with an energy from ATP hydrolysis by AlgS-AlgS. Alginate is degraded to constituent monosaccharides by three endotype (A1-I, II, and III) and a exotype (A1-IV) alginate lyases.

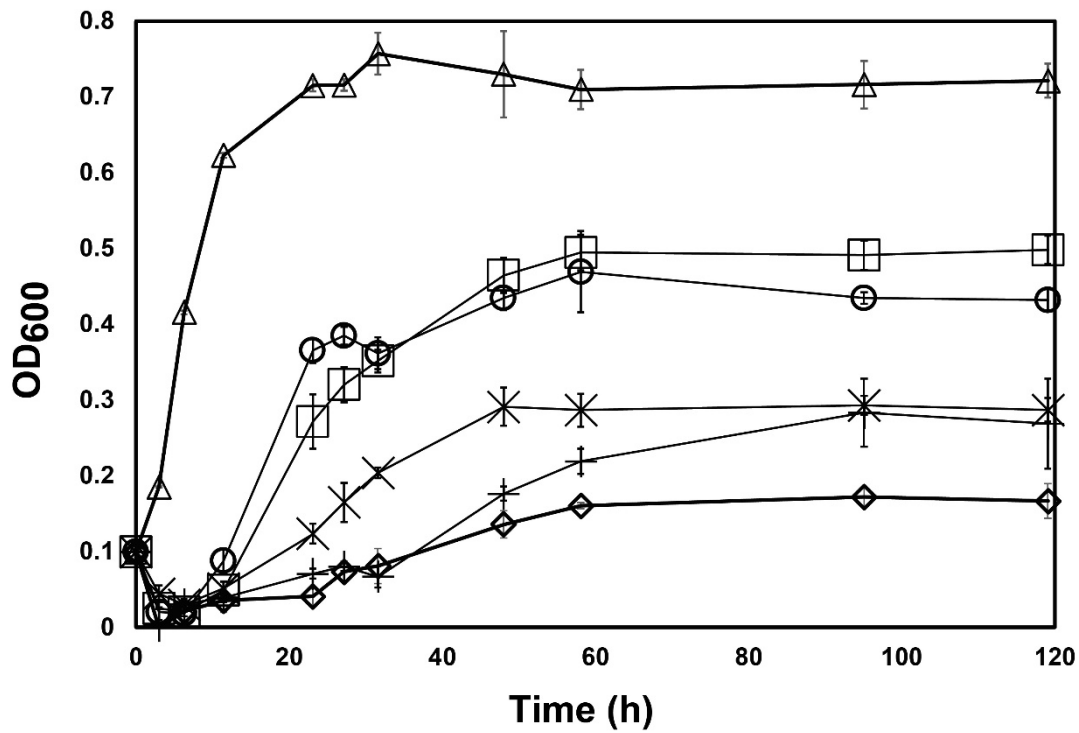

**Figure S2.** Assimilation of pectin by strain A1 cells. Bacterial cells were cultured in test tubes ( $n = 3$ ). Values indicate the average optical density at 600 nm ( $OD_{600}$ ) as follows: triangle, non-motile wild-type strain A1 cells; circle, strain A1-MP cells; rhombus, strain A1-M5 cells ; square, *sph1118*-complemented strain  $\Delta$ *sph1118* cells derived from strain A1-MP; cross, strain  $\Delta$ *sph1118* cells derived from strain A1-MP; plus, *sph1117-sph1118*-complemented A1-M5 cells. Error bars indicate standard deviations.

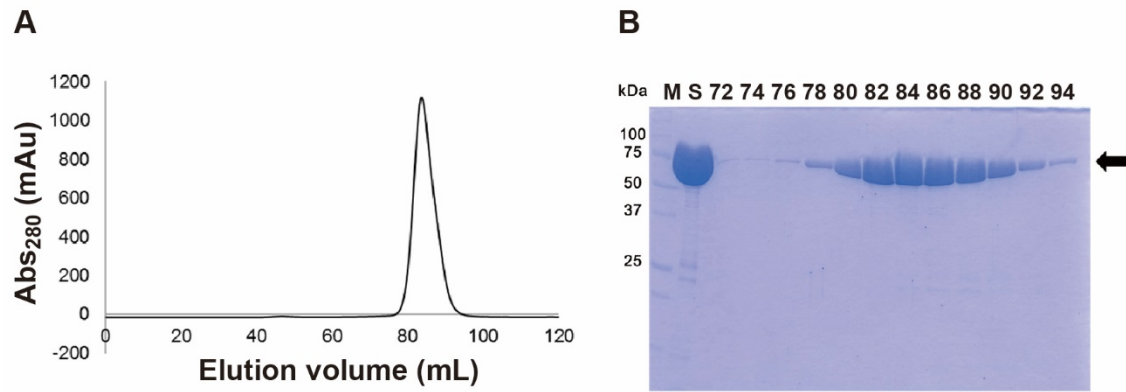

**Figure S3.** Purification of SPH1118. **(A)** Elution profile of the recombinant SPH1118 from gel filtration column chromatography. **(B)** SDS-PAGE profile of the recombinant SPH1118. Lane S, proteins before subjected to the gel filtration column chromatography; lanes 72-94, fractions containing the eluted protein from the chromatography. This electrophoretic profile is not an image cropped from different parts of the same gel or from different gels.
